# Supplementary material
Source: PubMed Central journal article supplement (PMC3992919)
Supplement: NIHMS567392-supplement-Supplemental_text_captions_for_Movies_S1_to_S04.pdf [file NIHMS567392-supplement-Supplemental_text_captions_for_Movies_S1_to_S04.pdf]

#### Movie S1

Formation of ectopic somites generated from a graft of stage 5 posterior primitive streak from a transgenic-GFP donor embryo, soaked in Noggin and then grafted into the area opaca of a wild-type host chick embryo, surrounded by beads soaked in Noggin. Many ectopic somites form almost simultaneously around 10-11 hours after grafting.

#### Movie S2

Higher magnification view of the region of the graft (fluorescence channel only) from Supplementary Movie 1, showing almost simultaneous formation of ectopic somites.

#### Movie S3

Formation of somites in a normal embryo. Embryo placed in modified New culture at stage 4 and incubated for about 24 hours. At about 8.5 hours (stage 6-8), the first 3 pairs of occipital somites form almost simultaneously. Thereafter somites form sequentially, about one pair every 90 min.

#### Movie S4

Simulation of ectopic somite formation using CompuCell3D as described in Computational Methods.
